# Supplementary material
Source: HighWire-hosted journal article supplement (http://ajnr-stage2.highwire.org/highwire/filestream/101200/field_highwire_adjunct_files/0/0659.pdf)
Supplement: 0659.pdf [file 0659.pdf]

**Table 2: Errors, bias, and variance of ReHo and FA measurements near CCMs.**

| <b>fMRI (ReHo)</b>               |                                    |                                  |
|----------------------------------|------------------------------------|----------------------------------|
| <b>Variable</b>                  | <b>Shell 1: 0-4mm</b>              | <b>Shell 2: 4-8mm</b>            |
| Error - Median APE [IQR]         | 25.1% [13.5-43.6]                  | 15.0% [6.9-26.4]                 |
| Bias - Mean PE [95% CI]          | -27.2% [-33.8, -19.8] <sup>a</sup> | -8.3% [-14.9, -1.1] <sup>b</sup> |
| Variance - % Deviation from Mean | 28.3% - 39.5%                      | 22.6% - 29.2%                    |

  

| <b>DTI (FA)</b>                  |                                |                                |
|----------------------------------|--------------------------------|--------------------------------|
| <b>Variable</b>                  | <b>Shell 1: 0-4mm</b>          | <b>Shell 2: 4-8mm</b>          |
| Error - Median APE [IQR]         | 9.2% [4.4-17.6]                | 6.5% [2.1-11.7]                |
| Bias - Mean PE [95% CI]          | -0.3% [-4.1, 4.8] <sup>c</sup> | -0.1% [-3.1, 2.9] <sup>d</sup> |
| Variance - % Deviation from Mean | 14.6% - 17.1%                  | 10.4% - 11.6%                  |

  

| <b>ReHo vs. FA: p-value</b> |                       |                       |
|-----------------------------|-----------------------|-----------------------|
| <b>Variable</b>             | <b>Shell 1: 0-4mm</b> | <b>Shell 2: 4-8mm</b> |
| Error                       | <0.001                | <0.001                |
| Bias                        | <0.001                | 0.16                  |
| Variance                    | <0.001                | <0.001                |

P-values of one-sample t-test to identify statistically significant bias: <sup>a</sup><0.001, <sup>b</sup>0.023, <sup>c</sup>0.90, <sup>d</sup>0.93
